# Supplementary material for: Lectin Activity in Commonly Consumed Plant-Based Foods: Calling for Method Harmonization and Risk Assessment
Source: MDPI journal article supplement (doi:10.3390/foods10112796), 2021-11-13
Supplement: s1 [file s1]

Adoxaceae family

Elderberry - ripe  
*Sambucus nigra* L.

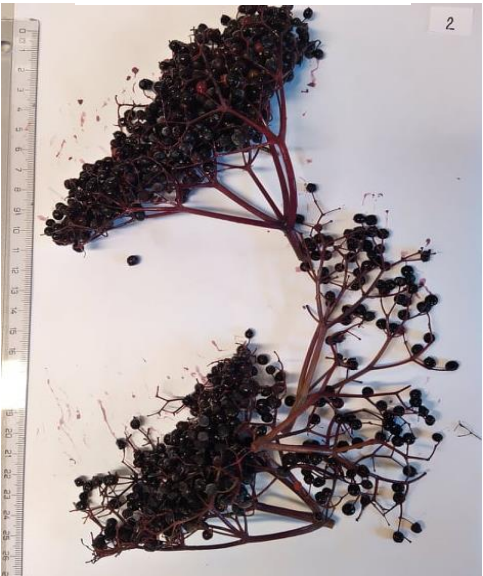

Elderberry - unripe  
*Sambucus nigra* L.

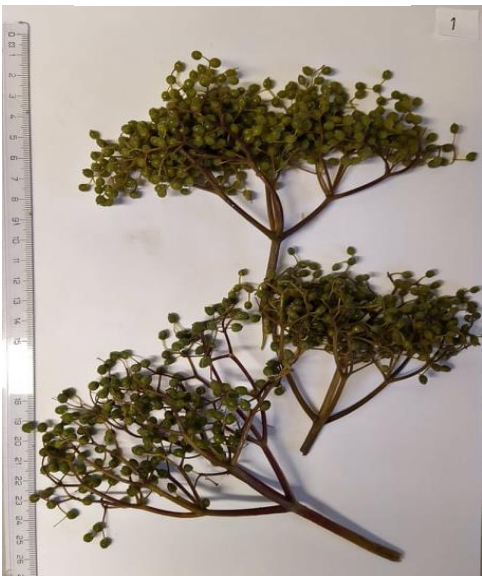

Amaranthaceae family

Nigella seed  
*Nigella sativa* L.

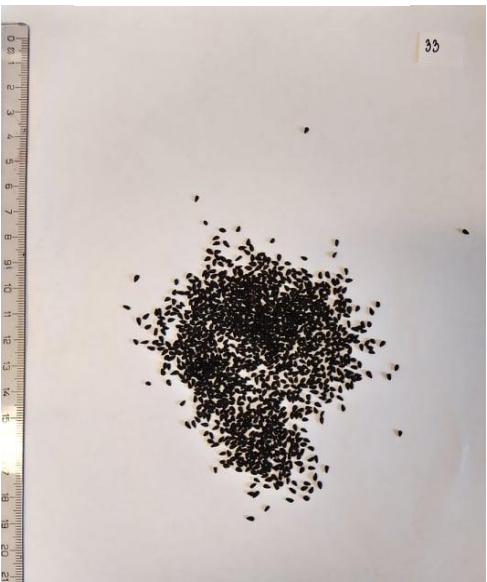

Quinoa, black  
*Chenopodium quinoa* Willd.

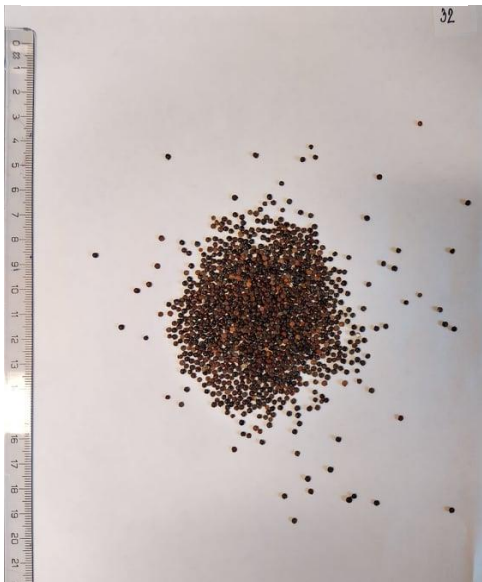

Quinoa, red  
*Chenopodium quinoa* Willd.

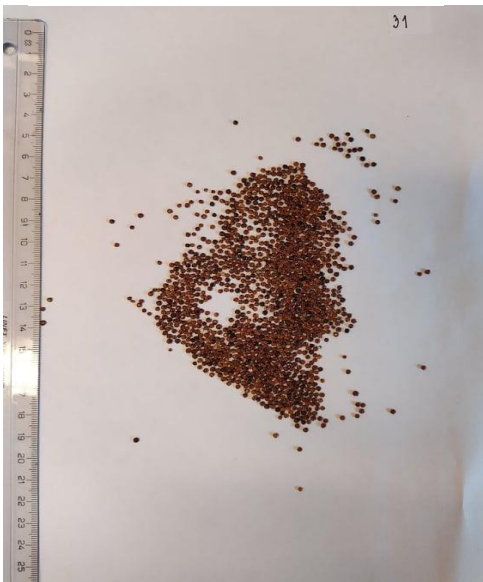

Quinoa, white  
*Chenopodium quinoa* Willd.

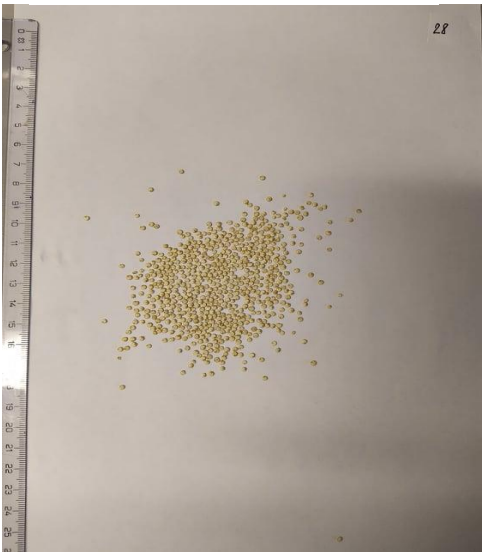

Cannabaceae family

Hemp seed  
*Cannabis sativa* L.

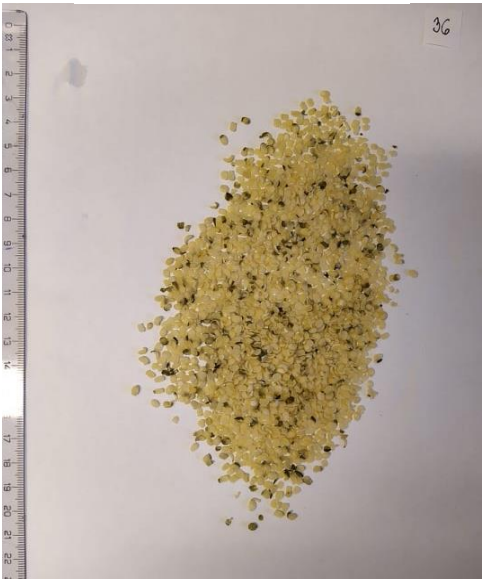



Picture S1 – Sample pictures

Fabaceae family

Adzuki bean  
*Vigna angularis* L.

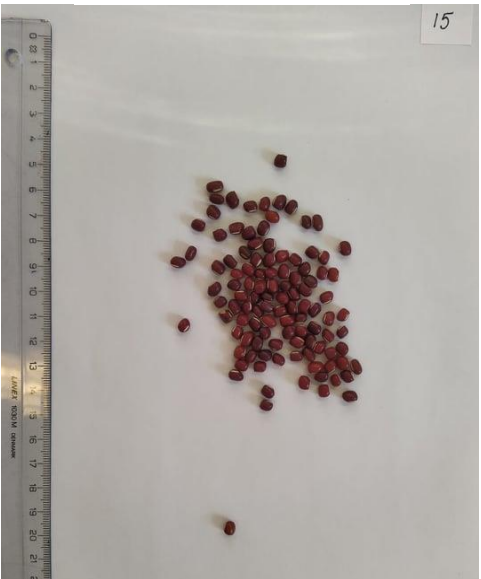

Beluga lentil  
*Lens culinaris* L.

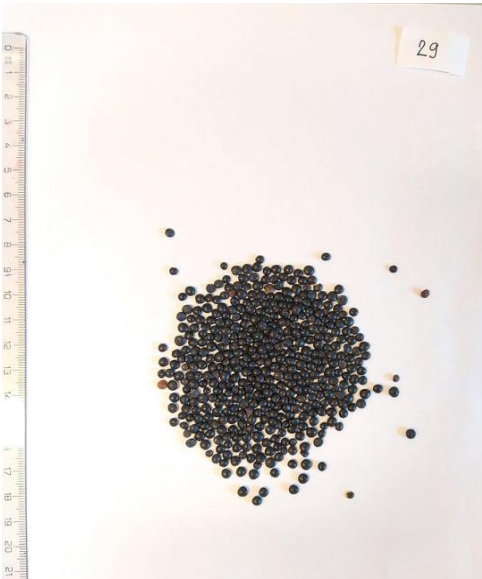

Black bean  
*Phaseolus vulgaris* L.

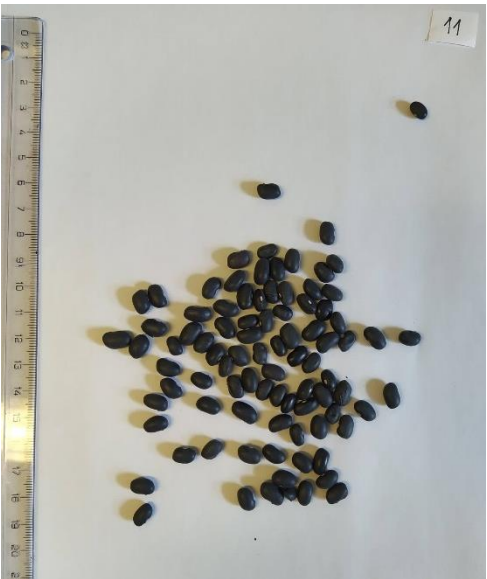

Borlotti bean  
*Phaseolus vulgaris* L.

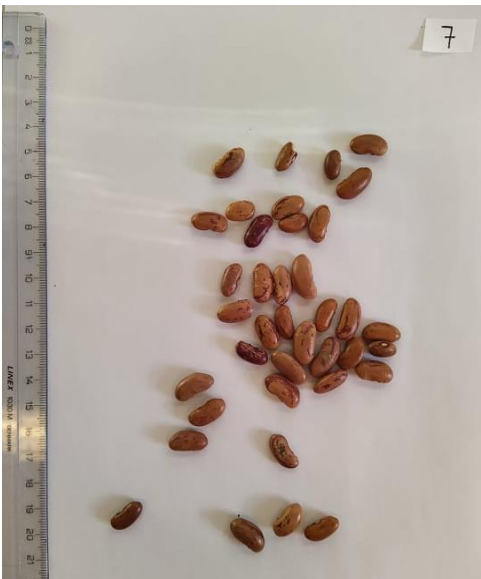

Brown lentil  
*Lens culinaris* L.

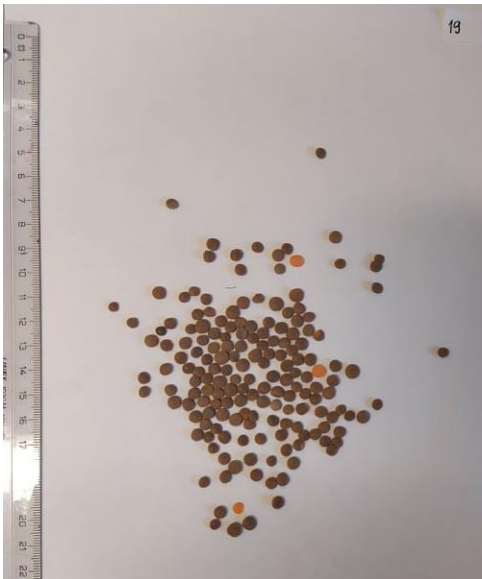

Chickpea, brown  
*Cicer arietinum* L.

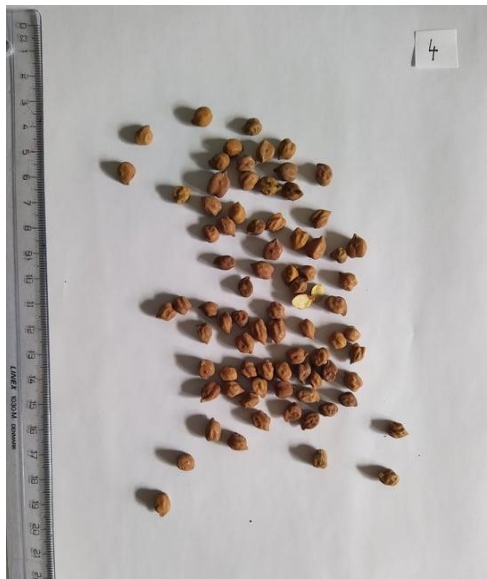

Chickpea, yellow  
*Cicer arietinum* L.

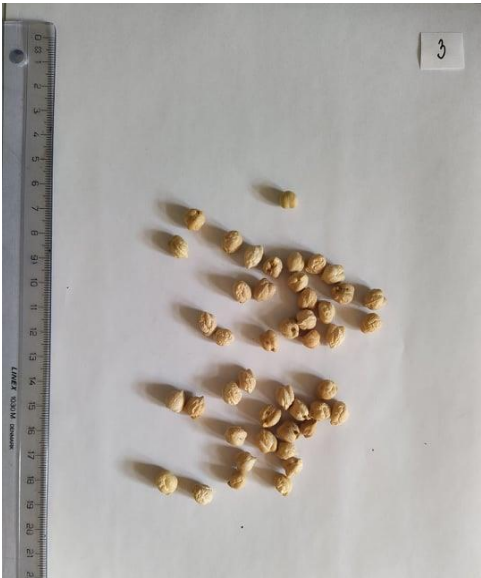

Cowpea  
*Vigna unguiculata* L.

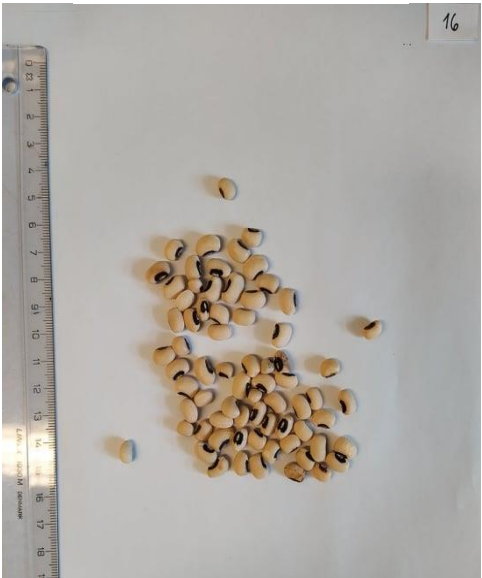

Edamame bean  
*Glycine max* L.

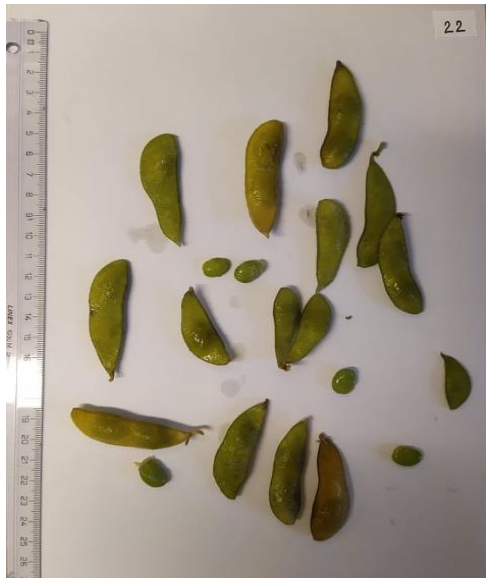

Fava bean  
*Vicia faba* L.

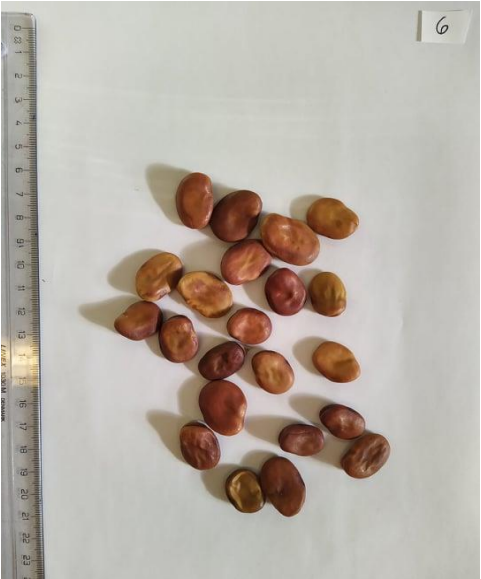

Green bean, broad  
*Phaseolus coccineus* L.\*

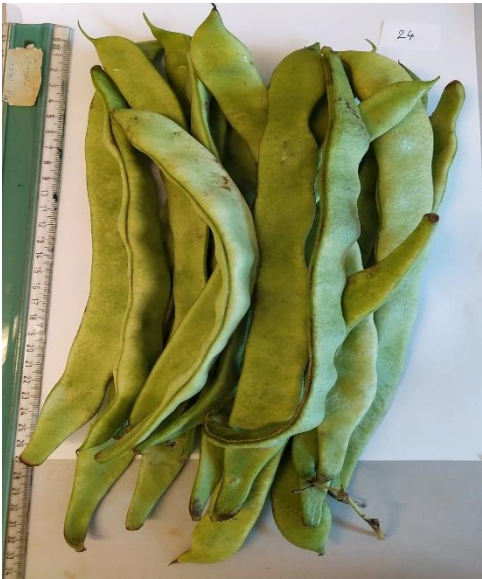

Green bean, haricot vert  
*Phaseolus vulgaris* L.

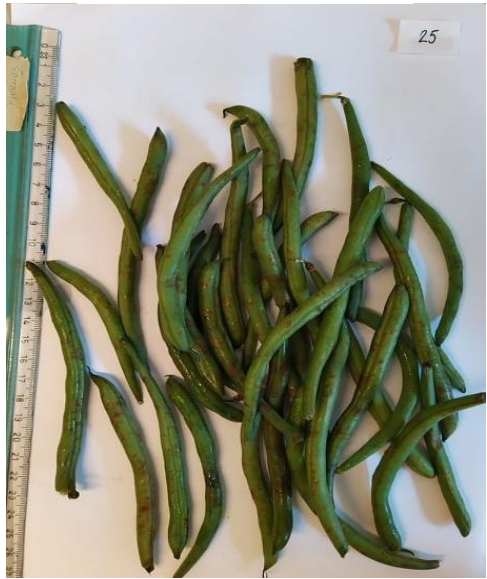



Picture S1 – Sample pictures

Green lentil  
*Lens culinaris* L.

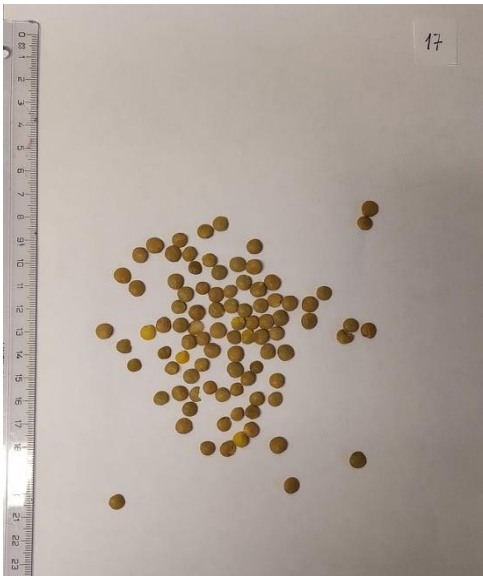

Green lentil, le Puy  
*Lens culinaris* L.

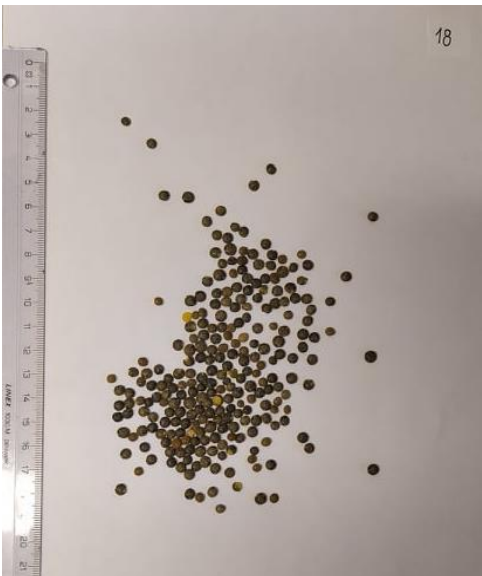

Horse bean  
*Vicia faba* L.

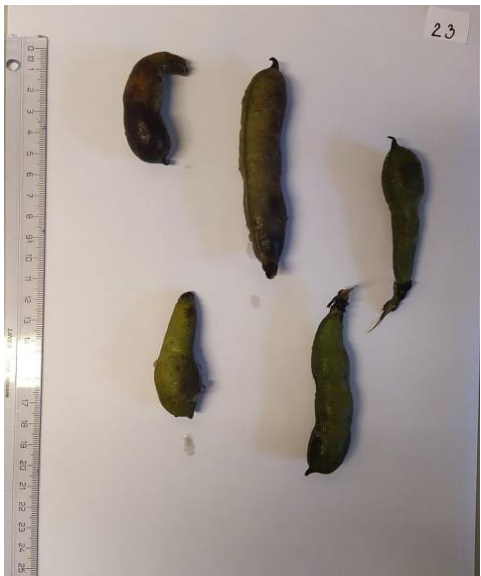

Kidney bean  
*Phaseolus vulgaris* L.

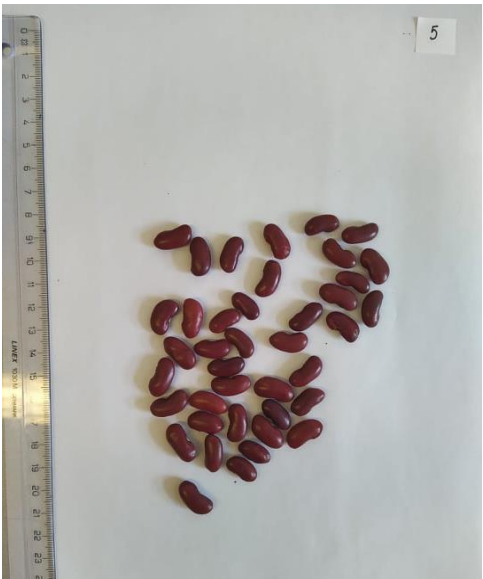

Lima bean  
*Phaseolus lunatus* L.

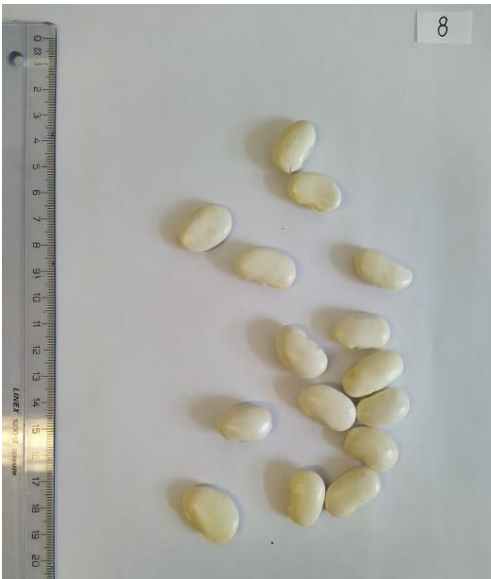

Mung bean  
*Vigna radiata* L.

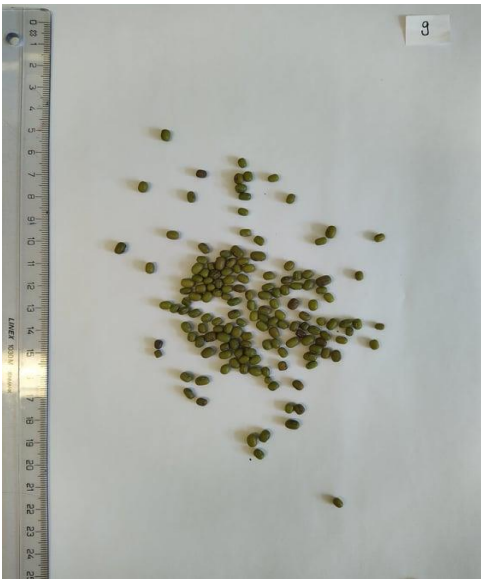

Pea leaf  
*Pisum sativum* L.

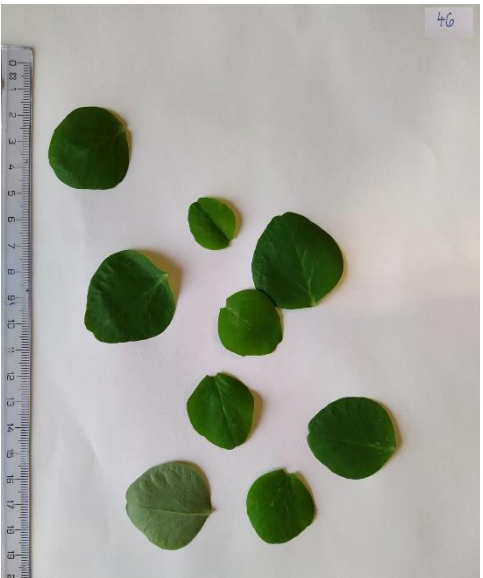

Pinto bean  
*Phaseolus vulgaris* L.

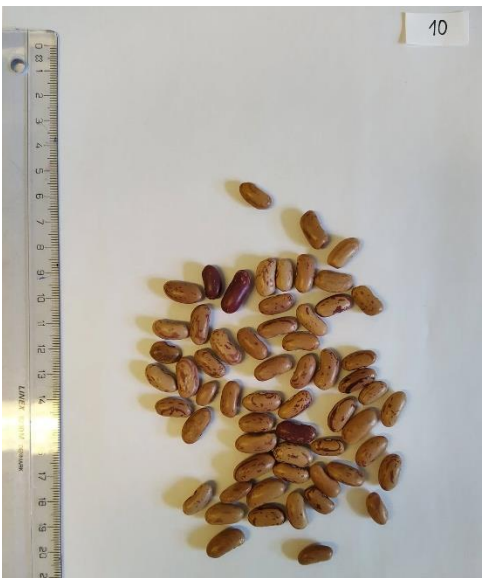

Rashti bean  
*Phaseolus vulgaris* L.

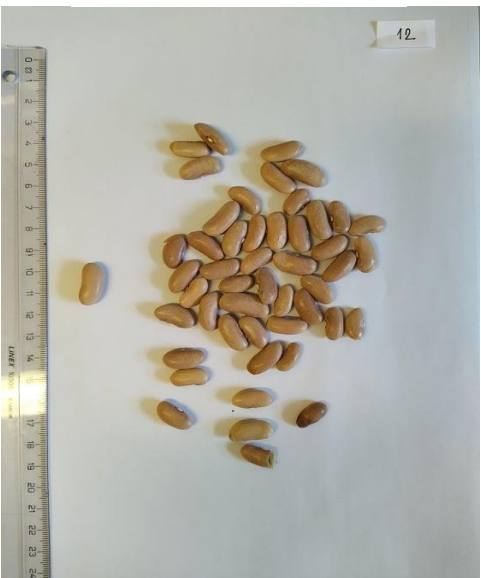

Red lentil  
*Lens culinaris* L.

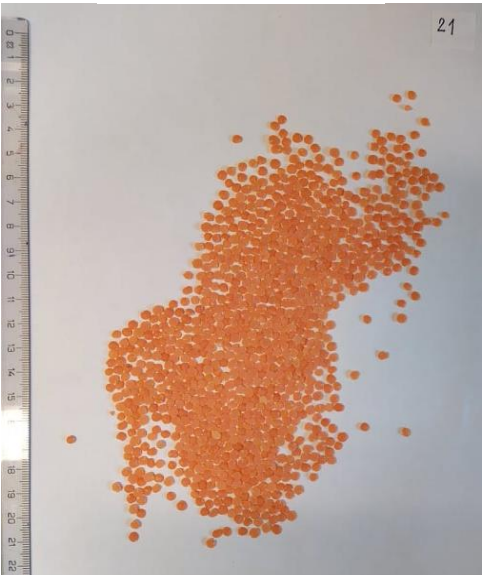

Soybean  
*Glycine max* L.

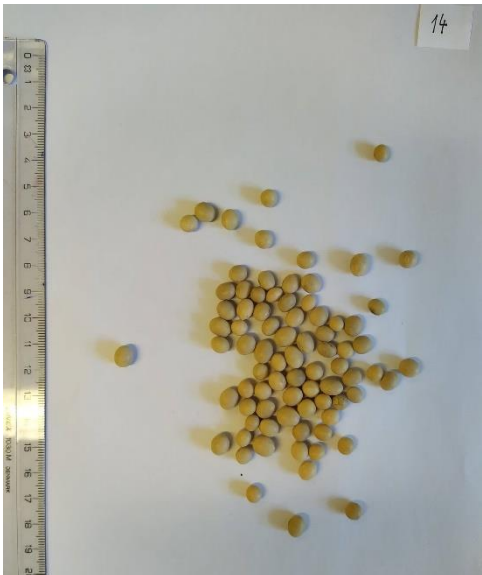

Sugar pea  
*Pisum sativum* L.

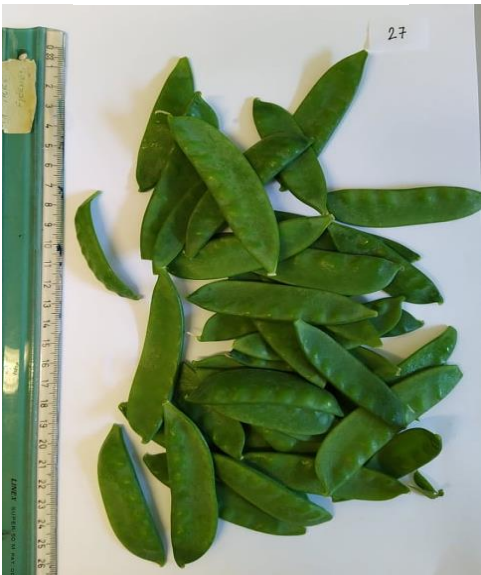



Picture S1 – Sample pictures

Sugar snap  
*Pisum sativum* L.

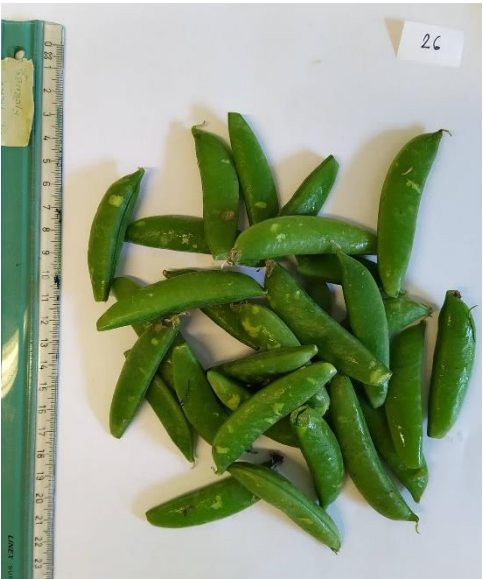

Urid bean  
*Vigna mungo* L.

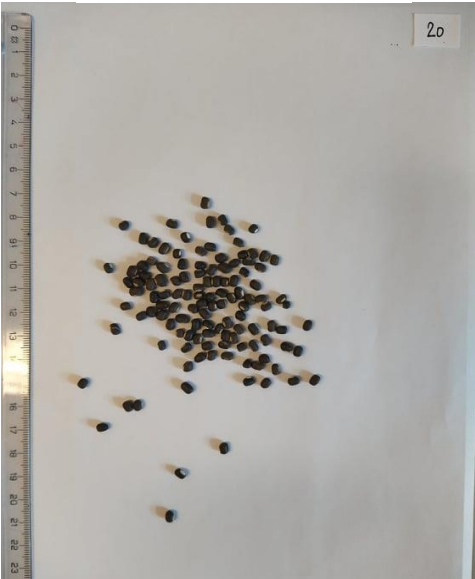

White bean  
*Phaseolus vulgaris* L.

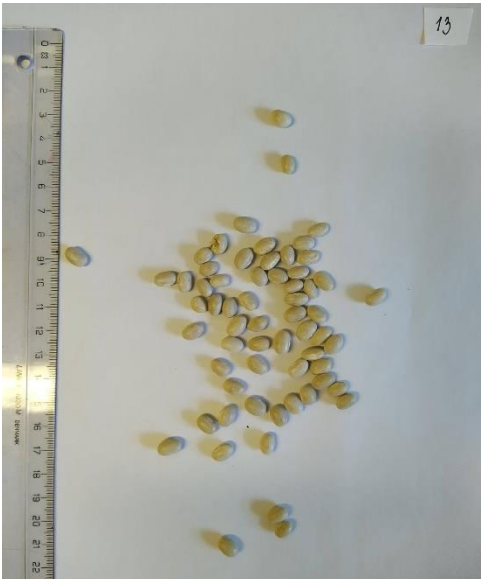

Gramineae family

Barley  
*Hordeum vulgare* L.

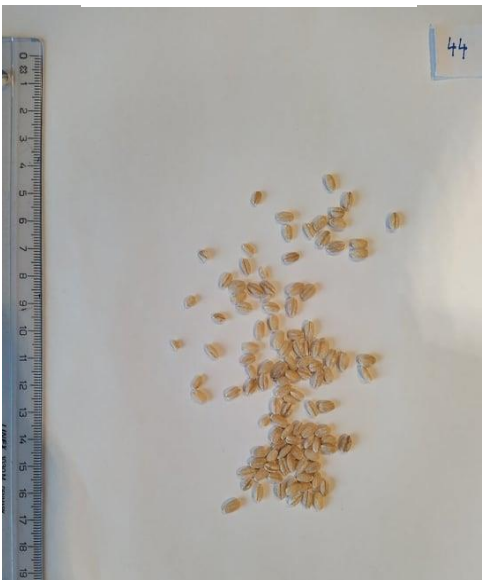

Rice  
*Oryza sativa* L.

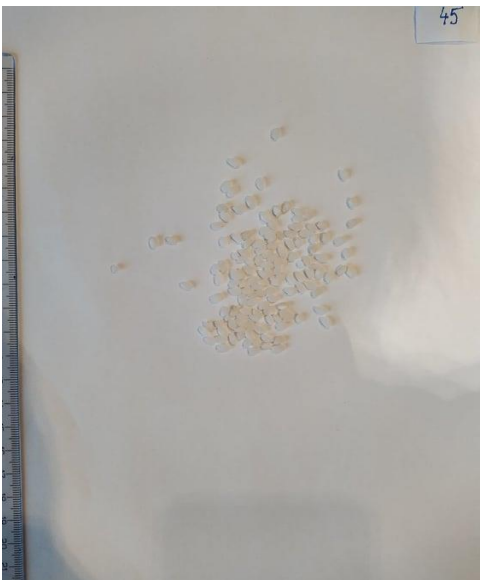

Wheat  
*Oryza sativa* L.

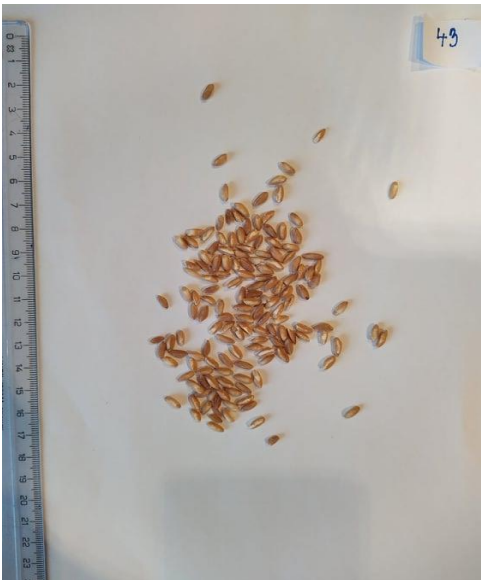

Lamiaceae family

Chia seed  
*Salvia hispanica* L.

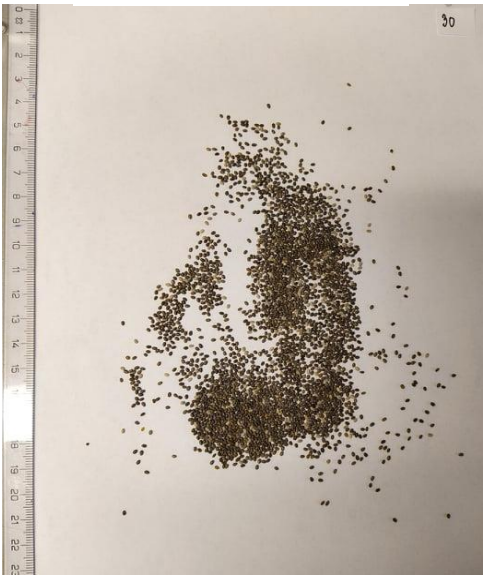

Linaceae family

Linseed  
*Linum usitatissimum* L.

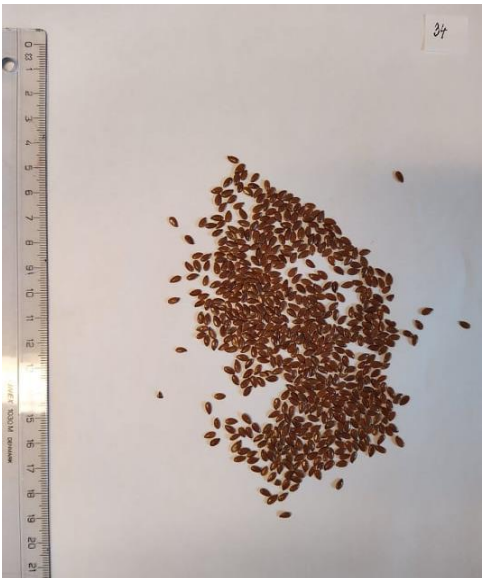

Pedaliaceae family

Sesame  
*Sesamum indicum* L.

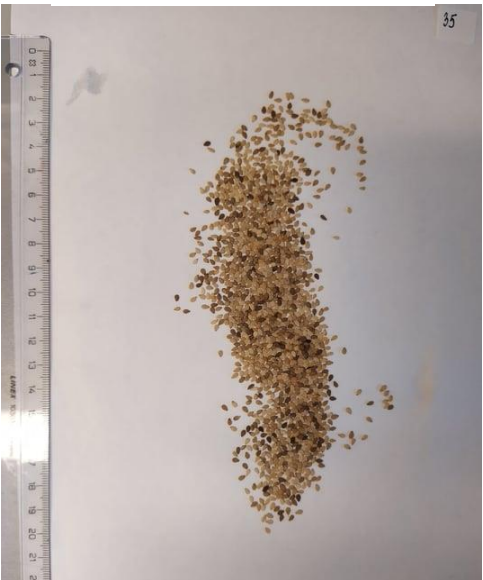

Solanaceae family

Bell pepper, green  
*Capsicum annuum* L.

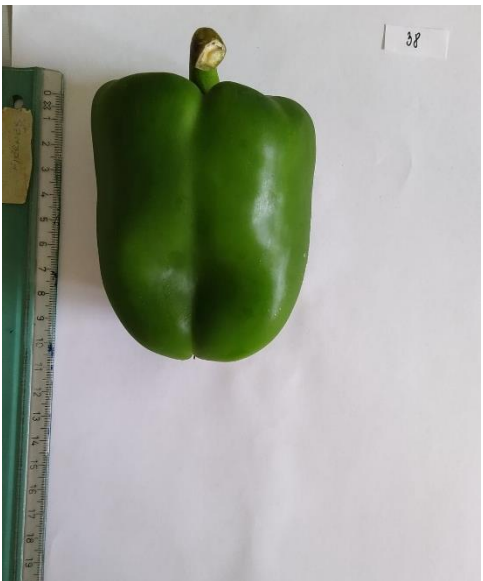

Bell pepper, red  
*Capsicum annuum* L.

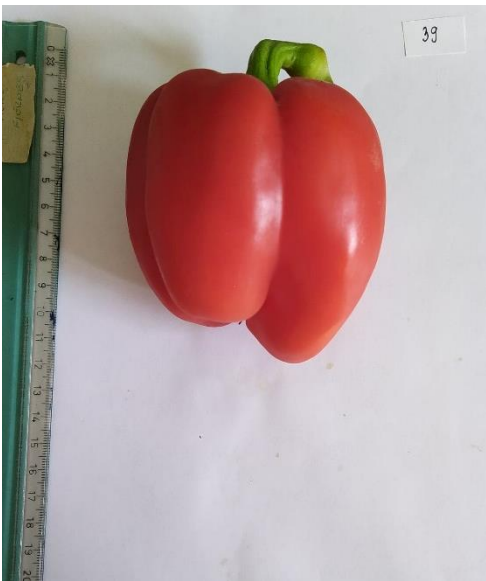

Bell pepper, yellow  
*Capsicum annuum* L.

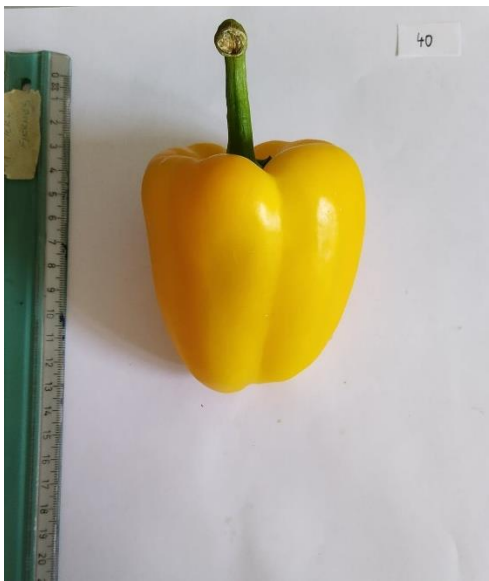

Eggplant  
*Solanum melongena* L.

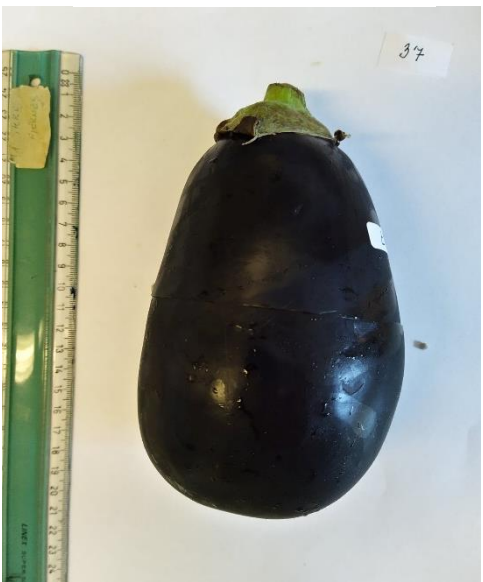

Potato  
*Solanum tuberosum* L.

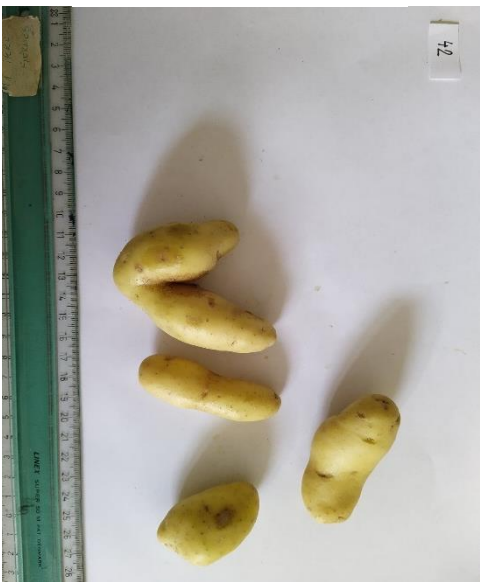

Tomato  
*Solanum lycopersicum* L.

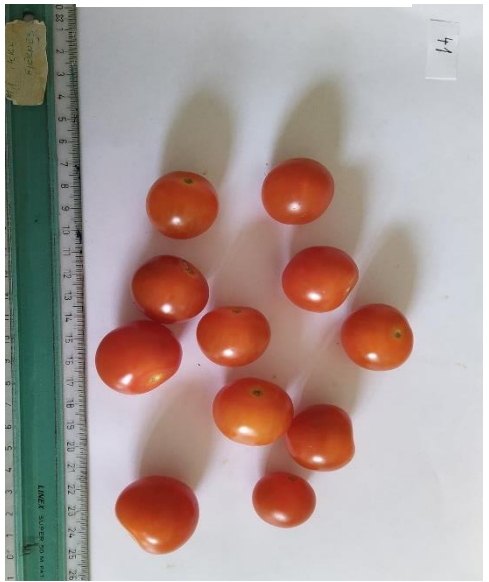

Latin names representing the common English names of samples were retrieved online [34,35].

\* This type of bean belongs to *Phaseolus coccineus* L., also known as Runner bean, Scarlet runner bean, or Multiflora bean [36].
