# Supplementary material for: Lectin Activity in Commonly Consumed Plant-Based Foods: Calling for Method Harmonization and Risk Assessment
Source: MDPI journal article supplement (doi:10.3390/foods10112796), 2021-11-13
Supplement: s1 [file s1]

Table S1 – Nitrogen results

Table S1. Nitrogen (N) and protein content in unprocessed samples

| Family<br>Common name    | Species name <sup>a</sup>        | N [%] <sup>b</sup> | Conversion<br>factor <sup>c</sup> | Protein [%] ± SD <sup>d</sup> |
|--------------------------|----------------------------------|--------------------|-----------------------------------|-------------------------------|
| <b>Adoxaceae</b>         |                                  |                    |                                   |                               |
| Elderberry - ripe        | <i>Sambucus nigra</i> L.         | 1.1                | 5.6                               | 6.0 ± 0.02                    |
| Elderberry - unripe      | <i>Sambucus nigra</i> L.         | 1.3                | 5.6                               | 7.1 ± 0.02                    |
| <b>Amaranthaceae</b>     |                                  |                    |                                   |                               |
| Nigella seed             | <i>Nigella sativa</i> L.         | 3.7                | 5.3                               | 19.6 ± 0.05                   |
| Quinoa, black            | <i>Chenopodium quinoa</i> Willd. | 2.1                | 5.3                               | 11.3 ± 0.03                   |
| Quinoa, red              | <i>Chenopodium quinoa</i> Willd. | 2.2                | 5.3                               | 11.7 ± 0.03                   |
| Quinoa, white            | <i>Chenopodium quinoa</i> Willd. | 2.7                | 5.3                               | 14.5 ± 0.04                   |
| <b>Cannabaceae</b>       |                                  |                    |                                   |                               |
| Hemp seed                | <i>Cannabis sativa</i> L.        | 5.5                | 5.3                               | 29.3 ± 0.08                   |
| <b>Fabaceae</b>          |                                  |                    |                                   |                               |
| Adzuki bean              | <i>Vigna angularis</i> L.        | 3.4                | 5.4                               | 18.5 ± 0.05                   |
| Beluga lentil            | <i>Lens culinaris</i> L.         | 3.9                | 5.4                               | 20.8 ± 0.06                   |
| Black bean               | <i>Phaseolus vulgaris</i> L.     | 3.8                | 5.4                               | 20.3 ± 0.05                   |
| Borlotti bean            | <i>Phaseolus vulgaris</i> L.     | 3.3                | 5.4                               | 18.0 ± 0.05                   |
| Brown lentil             | <i>Lens culinaris</i> L.         | 4.1                | 5.4                               | 22.0 ± 0.06                   |
| Chickpea, brown          | <i>Cicer arietinum</i> L.        | 3.1                | 5.4                               | 16.7 ± 0.05                   |
| Chickpea, yellow         | <i>Cicer arietinum</i> L.        | 3.4                | 5.4                               | 18.1 ± 0.05                   |
| Cowpea                   | <i>Vigna unguiculata</i> L.      | 3.8                | 5.4                               | 20.4 ± 0.06                   |
| Edamame bean             | <i>Glycine max</i> L.            | 3.7                | 5.5                               | 20.1 ± 0.05                   |
| Fava bean                | <i>Vicia faba</i> L.             | 4.5                | 5.4                               | 24.4 ± 0.07                   |
| Green bean, broad        | <i>Phaseolus coccineus</i> L.    | 3.1                | 5.4                               | 16.7 ± 0.05                   |
| Green bean, haricot vert | <i>Phaseolus vulgaris</i> L.     | 4.0                | 5.4                               | 21.6 ± 0.06                   |
| Green lentil             | <i>Lens culinaris</i> L.         | 4.0                | 5.4                               | 21.6 ± 0.06                   |
| Green lentil, le Puy     | <i>Lens culinaris</i> L.         | 5.1                | 5.4                               | 27.3 ± 0.07                   |
| Horse bean               | <i>Vicia faba</i> L.             | 4.1                | 5.4                               | 22.2 ± 0.06                   |
| Kidney bean              | <i>Phaseolus vulgaris</i> L.     | 3.8                | 5.4                               | 20.5 ± 0.06                   |
| Lima bean                | <i>Phaseolus lunatus</i> L.      | 3.4                | 5.4                               | 18.5 ± 0.05                   |
| Mung bean                | <i>Vigna radiata</i> L.          | 3.9                | 5.4                               | 20.8 ± 0.06                   |
| Pea leave                | <i>Pisum sativum</i> L.          | 5.1                | 5.6                               | 28.5 ± 0.08                   |
| Pinto bean               | <i>Phaseolus vulgaris</i> L.     | 3.2                | 5.4                               | 17.4 ± 0.05                   |
| Rashti bean              | <i>Phaseolus vulgaris</i> L.     | 3.8                | 5.4                               | 20.5 ± 0.06                   |
| Red lentil               | <i>Lens culinaris</i> L.         | 4.6                | 5.4                               | 25.0 ± 0.07                   |
| Soybean                  | <i>Glycine max</i> L.            | 6.5                | 5.5                               | 35.7 ± 0.10                   |
| Sugar pea                | <i>Pisum sativum</i> L.          | 3.8                | 5.4                               | 20.6 ± 0.06                   |
| Sugar snap               | <i>Pisum sativum</i> L.          | 3.4                | 5.4                               | 18.1 ± 0.05                   |
| Urid bean                | <i>Vigna mungo</i> L.            | 3.8                | 5.4                               | 20.3 ± 0.05                   |
| White bean               | <i>Phaseolus vulgaris</i> L.     | 3.8                | 5.4                               | 20.6 ± 0.06                   |
| <b>Gramineae</b>         |                                  |                    |                                   |                               |
| Barley                   | <i>Hordeum vulgare</i> L.        | 2.0                | 5.4                               | 10.6 ± 0.03                   |
| Rice                     | <i>Oryza sativa</i> L.           | 1.4                | 5.4                               | 7.3 ± 0.02                    |
| Wheat                    | <i>Triticum aestivum</i> L.      | 2.1                | 5.4                               | 11.4 ± 0.03                   |
| <b>Lamiaceae</b>         |                                  |                    |                                   |                               |
| Chia seed                | <i>Salvia hispanica</i> L.       | 3.3                | 5.3                               | 17.3 ± 0.05                   |
| <b>Linaceae</b>          |                                  |                    |                                   |                               |
| Linseed                  | <i>Linum usitatissimum</i> L.    | 3.7                | 5.3                               | 19.5 ± 0.05                   |
| <b>Pedaliaceae</b>       |                                  |                    |                                   |                               |
| Sesame                   | <i>Sesamum indicum</i> L.        | 3.4                | 5.3                               | 17.9 ± 0.05                   |
| <b>Solanaceae</b>        |                                  |                    |                                   |                               |
| Bell pepper, green       | <i>Capsicum annuum</i> L.        | 1.7                | 5.4                               | 9.2 ± 0.02                    |
| Bell pepper, red         | <i>Capsicum annuum</i> L.        | 1.4                | 5.4                               | 7.5 ± 0.02                    |

Table S1 – Nitrogen results

|                     |                                |     |     |             |
|---------------------|--------------------------------|-----|-----|-------------|
| Bell pepper, yellow | <i>Capsicum annuum</i> L.      | 1.1 | 5.4 | 6.0 ± 0.02  |
| Eggplant            | <i>Solanum melongena</i> L.    | 2.1 | 5.4 | 11.2 ± 0.03 |
| Potato              | <i>Solanum tuberosum</i> L.    | 1.4 | 5.4 | 7.5 ± 0.02  |
| Tomato              | <i>Solanum lycopersicum</i> L. | 2.2 | 5.4 | 11.7 ± 0.03 |

<sup>a</sup> Latin names representing the common English names of samples were retrieved online [34,35].

<sup>b</sup> Results are rounded to the nearest tenths.

<sup>c</sup> Conversion factors were established elsewhere [37,38].

<sup>d</sup> The values (n = 1) ± standard deviation (SD). SD was calculated from the positive control, which was analysed 8 times under reproducible conditions.
