# Supplementary material for: Lectin Activity in Commonly Consumed Plant-Based Foods: Calling for Method Harmonization and Risk Assessment
Source: Foods. 2021 Nov 13;10(11):2796. doi: 10.3390/foods10112796 (PMC8618113; doi:10.3390/foods10112796)
Supplement: Supplementary file 1 [file foods-10-02796-s001.zip]

Archive with 4 entries (4 files):
- Figure S1 - Lectin activity results for all unprocessed samples.pdf
- Picture S1 - Sample pictures.pdf
- Picture S2 - Differently displayed results.pdf
- Table S1 - Nitrogen results.pdf
